# Supplementary material for: Silence as a way of niche adaptation: mecC-MRSA with variations in the accessory gene regulator (agr) functionality express kaleidoscopic phenotypes
Source: PubMed Central journal article supplement (PMC7479134; doi:10.1038/s41598-020-71640-4), 2020-09-08
Supplement: 41598_2020_71640_MOESM1_ESM.pdf [file 41598_2020_71640_MOESM1_ESM.pdf]

**Silence as a way of niche adaptation: *mecC*-MRSA with variations in the accessory gene regulator (*agr*) functionality express kaleidoscopic phenotypes**

Charlotte Huber<sup>1</sup>, Ivonne Stamm<sup>2</sup>, Wilma Ziebuhr<sup>3</sup>, Gabriella Marincola<sup>3</sup>, Markus Bischoff<sup>4</sup>, Birgit Strommenger<sup>5</sup>, Greta Jaschkowitz<sup>3</sup>, Tessa Marciniak<sup>3</sup>, Christiane Cuny<sup>5</sup>, Wolfgang Witte<sup>5</sup>, Joerg Doellinger<sup>6</sup>, Christoph Schaudinn<sup>1</sup>, Andrea Thürmer<sup>7</sup>, Lennard Epping<sup>8</sup>, Torsten Semmler<sup>8</sup>, Antina Lübke-Becker<sup>9</sup>, Lothar H. Wieler<sup>10</sup> and Birgit Walther<sup>1\*</sup>

<sup>1</sup>Advanced Light and Electron Microscopy (ZBS4), Robert Koch Institute, Berlin, Germany

<sup>2</sup>IDEXX GmbH, Ludwigsburg, Germany

<sup>3</sup>Institute for Molecular Infection Biology, University of Würzburg, Würzburg, Germany

<sup>4</sup>Institute of Medical Microbiology and Hygiene, Saarland University, Homburg, Germany

<sup>5</sup>National Reference Centre for Staphylococci and Enterococci, Robert Koch Institute, Wernigerode, Germany

<sup>6</sup>Proteomics and Spectroscopy (ZBS6), Robert Koch Institute, Berlin, Germany

<sup>7</sup>Genome Sequencing (MF2), Robert Koch Institute, Berlin, Germany

<sup>8</sup>Microbial Genomics (NG1), Robert Koch Institute, Berlin, Germany

<sup>9</sup>Institute of Microbiology and Epizootics, Freie Universität Berlin, Berlin, Germany

<sup>10</sup>Methodology and Research Infrastructure, Robert Koch Institute, Berlin, Germany

\*corresponding author: waltherb@rki.de

**Supplemental figure 1.** Synergistic production of different haemolysins and alpha haemolysin (Hla) protein abundance levels

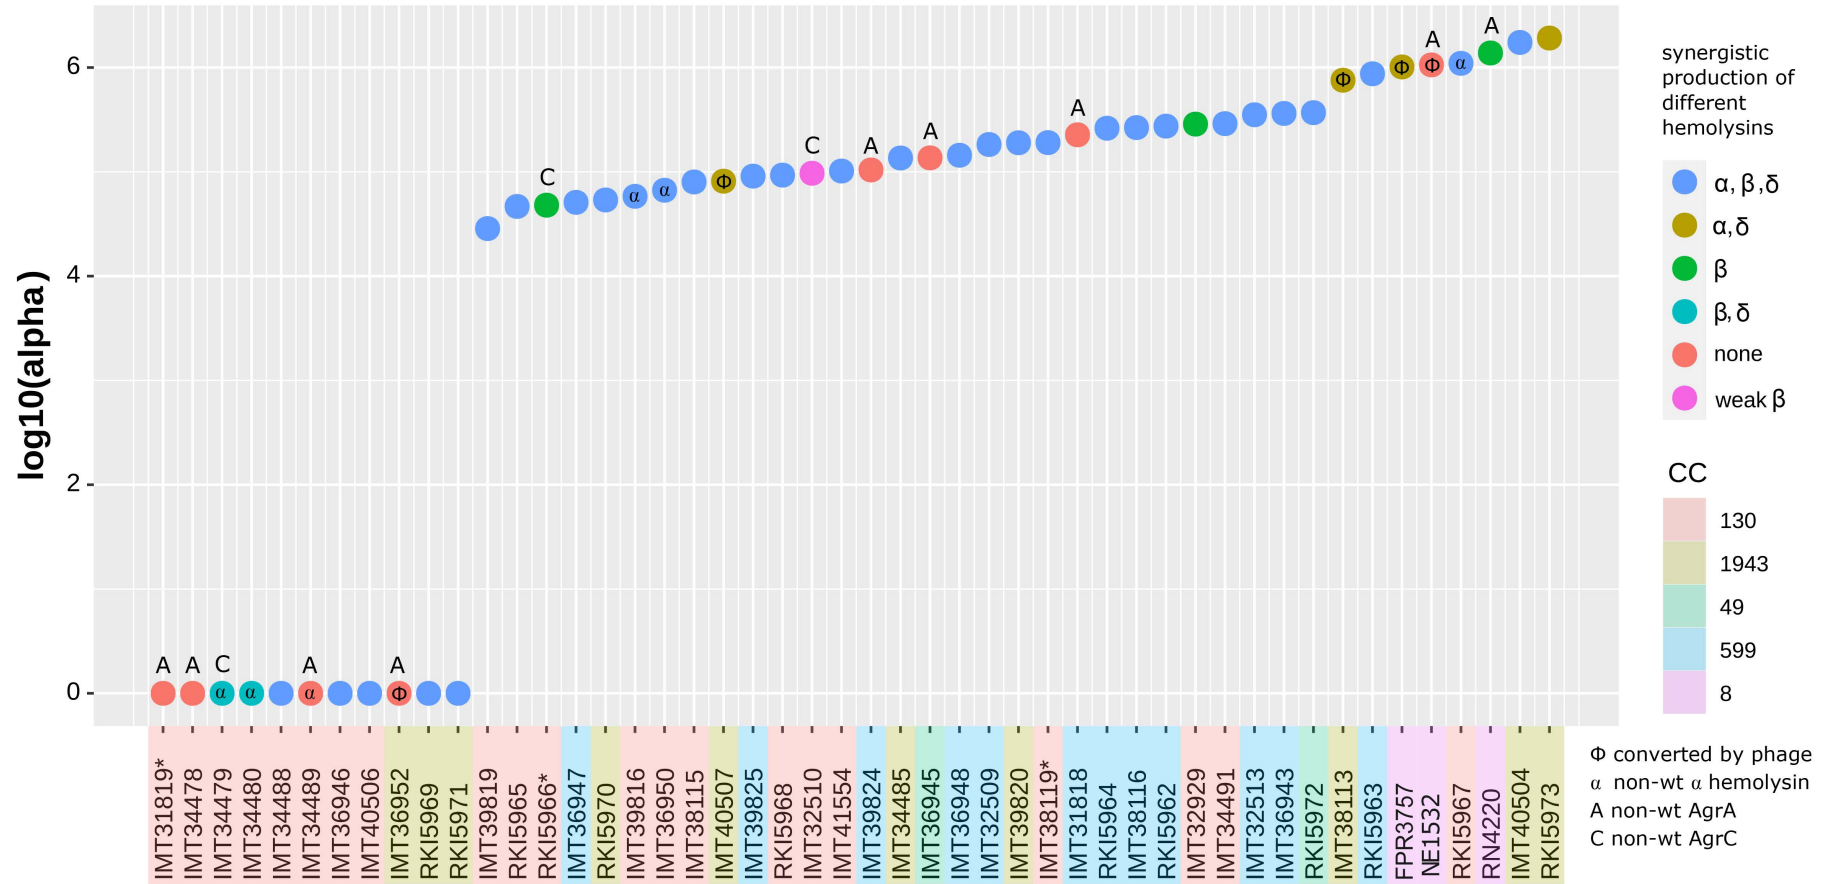

Supplemental figure 2. CAMP phenomenon and  $\beta$ -haemolysin (Hlb) protein abundances

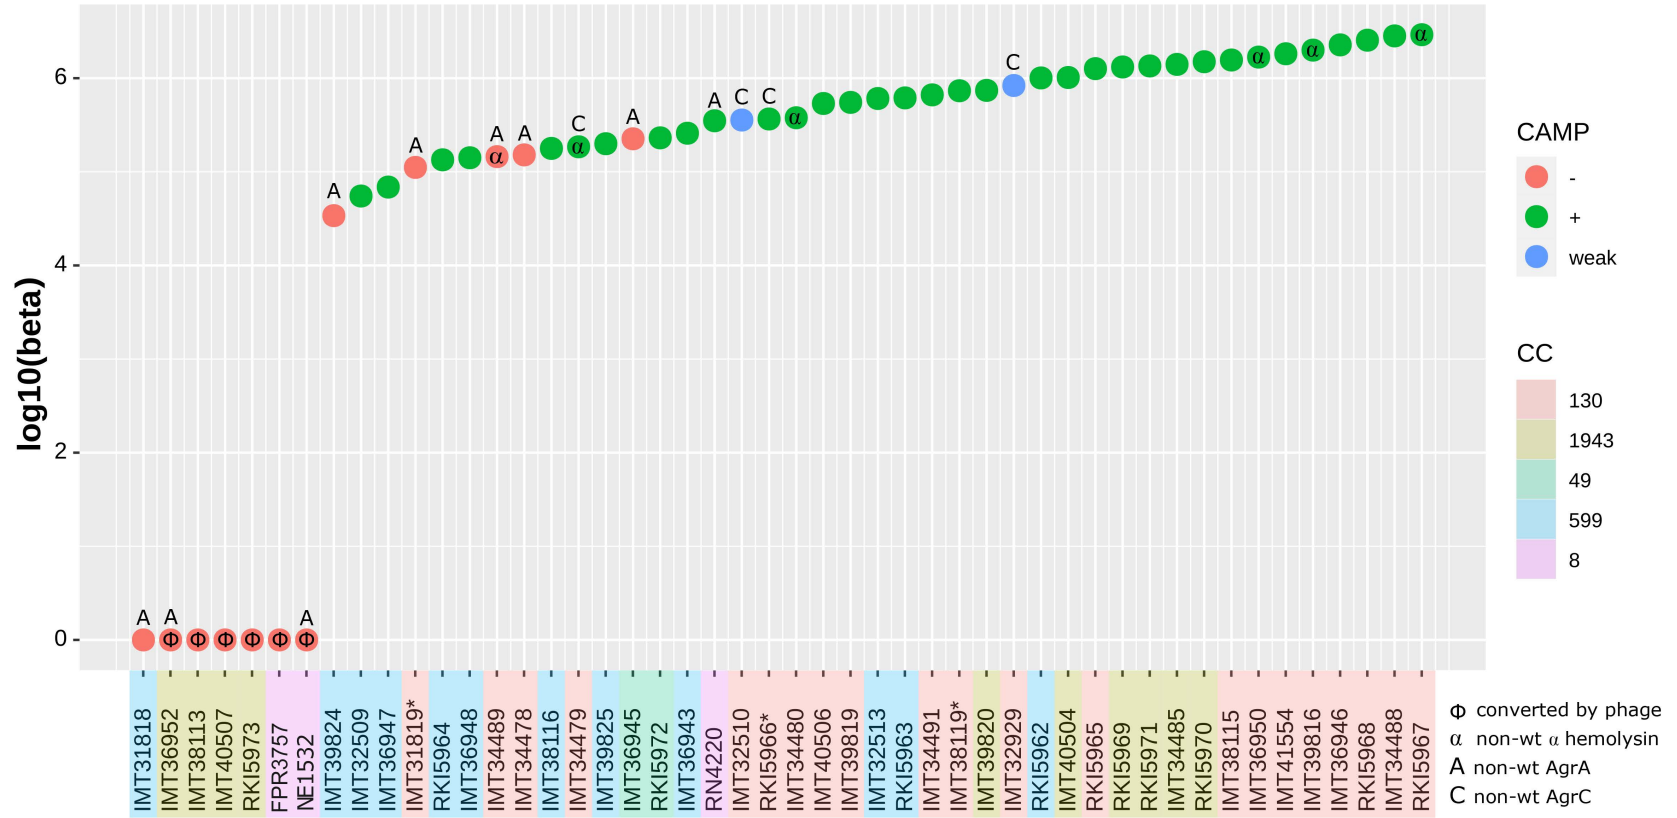

## Supplementary Information file

**Supplemental Table 1:** Dynamic window sizing for mass spectrometry

| Mass spectrometry |           |             |
|-------------------|-----------|-------------|
| start [m/z]       | end [m/z] | width [m/z] |
| 349,5             | 382,5     | 33          |
| 381,5             | 406,5     | 25          |
| 405,5             | 422,5     | 17          |
| 421,5             | 437,5     | 16          |
| 436,5             | 449,5     | 13          |
| 448,5             | 460,5     | 12          |
| 459,5             | 469,5     | 10          |
| 468,5             | 478,5     | 10          |
| 477,5             | 487,5     | 10          |
| 486,5             | 496,5     | 10          |
| 495,5             | 505,5     | 10          |
| 504,5             | 514,5     | 10          |
| 513,5             | 522,5     | 9           |
| 521,5             | 531,5     | 10          |
| 530,5             | 540,5     | 10          |
| 539,5             | 548,5     | 9           |
| 547,5             | 555,5     | 8           |
| 554,5             | 563,5     | 9           |
| 562,5             | 572,5     | 10          |
| 571,5             | 581,5     | 10          |
| 580,5             | 590,5     | 10          |
| 589,5             | 599,5     | 10          |
| 598,5             | 608,5     | 10          |
| 607,5             | 617,5     | 10          |
| 616,5             | 626,5     | 10          |
| 625,5             | 635,5     | 10          |
| 634,5             | 644,5     | 10          |
| 643,5             | 652,5     | 9           |
| 651,5             | 661,5     | 10          |
| 660,5             | 671,5     | 11          |
| 670,5             | 680,5     | 10          |
| 679,5             | 690,5     | 11          |
| 689,5             | 700,5     | 11          |
| 699,5             | 710,5     | 11          |
| 709,5             | 721,5     | 12          |
| 720,5             | 733,5     | 13          |
| 732,5             | 745,5     | 13          |
| 744,5             | 758,5     | 14          |

|        |        |    |
|--------|--------|----|
| 757,5  | 770,5  | 13 |
| 769,5  | 782,5  | 13 |
| 781,5  | 795,5  | 14 |
| 794,5  | 811    | 16 |
| 810    | 827    | 17 |
| 825,5  | 843,5  | 18 |
| 842,5  | 860,5  | 18 |
| 859,5  | 880,5  | 21 |
| 879,5  | 902,5  | 23 |
| 901,5  | 926,5  | 25 |
| 925,5  | 954,5  | 29 |
| 953,5  | 986,5  | 33 |
| 985,5  | 1023,5 | 38 |
| 1022,5 | 1070,5 | 48 |
| 1069,5 | 1150,5 | 81 |

**Supplemental Table 2: Genome Accession Numbers**

BioProject accessions PRJNA588740

| <b>Genome accession numbers</b> |                  |
|---------------------------------|------------------|
| <b>sample-ID</b>                | <b>accession</b> |
| IMT31818                        | SRR10426558      |
| IMT31819                        | SRR10426557      |
| IMT32509                        | SRR10426546      |
| IMT32510                        | SRR10426535      |
| IMT32513                        | SRR10426524      |
| IMT32929                        | SRR10426518      |
| IMT34478                        | SRR10426517      |
| IMT34479                        | SRR10426516      |
| IMT34480                        | SRR10426515      |
| IMT34485                        | SRR10426514      |
| IMT34488                        | SRR10426556      |
| IMT34489                        | SRR10426555      |
| IMT34491                        | SRR10426554      |
| IMT36943                        | SRR10426553      |
| IMT36945                        | SRR10426552      |
| IMT36946                        | SRR10426551      |
| IMT36947                        | SRR10426550      |
| IMT36948                        | SRR10426549      |
| IMT36950                        | SRR10426548      |
| IMT36952                        | SRR10426547      |
| IMT38113                        | SRR10426545      |

|          |             |
|----------|-------------|
| IMT38115 | SRR10426544 |
| IMT38116 | SRR10426543 |
| IMT38119 | SRR10426542 |
| IMT39816 | SRR10426541 |
| IMT39819 | SRR10426540 |
| IMT39820 | SRR10426539 |
| IMT39824 | SRR10426538 |
| IMT39825 | SRR10426537 |
| IMT40504 | SRR10426536 |
| IMT40506 | SRR10426534 |
| IMT40507 | SRR10426533 |
| IMT41554 | SRR10426532 |
| RKI5962  | SRR10426531 |
| RKI5963  | SRR10426530 |
| RKI5964  | SRR10426529 |
| RKI5965  | SRR10426528 |
| RKI5966  | SRR10426527 |
| RKI5967  | SRR10426526 |
| RKI5968  | SRR10426525 |
| RKI5969  | SRR10426523 |
| RKI5970  | SRR10426522 |
| RKI5971  | SRR10426521 |
| RKI5972  | SRR10426520 |
| RKI5973  | SRR10426519 |

**Supplemental Table 3: ).** Pairwise SNP-distances between the core genomes were calculated for all MRSA isolates

| IMT32929 | IMT34488 | RKI5965 | IMT39816 | IMT39819 | RKI5966 | IMT34489 | IMT34478 | IMT31819 | IMT40506 | IMT39825 | RKI5962 | RKI5964 | RKI5963 | IMT36948 | IMT36947 | IMT32513 | IMT39824 | IMT36943 | IMT31818 | IMT38116 | IMT32509 |
|----------|----------|---------|----------|----------|---------|----------|----------|----------|----------|----------|---------|---------|---------|----------|----------|----------|----------|----------|----------|----------|----------|
| 15161    | 15158    | 15161   | 15172    | 15137    | 15133   | 15151    | 15141    | 15138    | 15140    | 15341    | 15331   | 15374   | 15411   | 15385    | 15385    | 15330    | 15346    | 15326    | 15343    | 15354    | 15334    |
| 15130    | 15127    | 15130   | 15141    | 15106    | 15102   | 15120    | 15110    | 15107    | 15109    | 15312    | 15302   | 15345   | 15382   | 15356    | 15356    | 15301    | 15317    | 15297    | 15314    | 15325    | 15305    |
| 10509    | 10506    | 10509   | 10514    | 10485    | 10476   | 10495    | 10487    | 10482    | 10484    | 10934    | 10922   | 10965   | 11006   | 10976    | 10976    | 10923    | 10935    | 10917    | 10936    | 10947    | 10927    |
| 10502    | 10497    | 10502   | 10507    | 10478    | 10469   | 10488    | 10480    | 10475    | 10477    | 10927    | 10915   | 10958   | 10999   | 10969    | 10969    | 10916    | 10928    | 10910    | 10929    | 10940    | 10920    |
| 10521    | 10518    | 10521   | 10526    | 10497    | 10488   | 10507    | 10499    | 10494    | 10496    | 10946    | 10934   | 10977   | 11018   | 10988    | 10988    | 10935    | 10947    | 10929    | 10948    | 10959    | 10939    |
| 10514    | 10511    | 10514   | 10519    | 10490    | 10481   | 10500    | 10492    | 10487    | 10489    | 10940    | 10928   | 10971   | 11012   | 10982    | 10982    | 10929    | 10941    | 10923    | 10942    | 10953    | 10933    |
| 10512    | 10509    | 10512   | 10517    | 10488    | 10479   | 10498    | 10490    | 10485    | 10487    | 10939    | 10927   | 10970   | 11011   | 10981    | 10981    | 10928    | 10940    | 10922    | 10941    | 10952    | 10932    |
| 10502    | 10499    | 10502   | 10507    | 10478    | 10469   | 10488    | 10480    | 10475    | 10477    | 10929    | 10917   | 10960   | 11001   | 10971    | 10971    | 10918    | 10930    | 10912    | 10931    | 10942    | 10922    |
| 10511    | 10508    | 10511   | 10516    | 10487    | 10478   | 10497    | 10489    | 10484    | 10486    | 10937    | 10925   | 10968   | 11009   | 10979    | 10979    | 10926    | 10938    | 10920    | 10939    | 10950    | 10930    |
| 10511    | 10508    | 10511   | 10516    | 10487    | 10478   | 10497    | 10489    | 10484    | 10486    | 10937    | 10925   | 10968   | 11009   | 10979    | 10979    | 10926    | 10938    | 10920    | 10939    | 10950    | 10930    |
| 10510    | 10507    | 10510   | 10515    | 10486    | 10477   | 10496    | 10488    | 10483    | 10485    | 10936    | 10924   | 10967   | 11008   | 10978    | 10978    | 10925    | 10937    | 10919    | 10938    | 10949    | 10929    |
| 10548    | 10545    | 10550   | 10555    | 10526    | 10517   | 10536    | 10528    | 10523    | 10525    | 10974    | 10962   | 11005   | 11046   | 11016    | 11016    | 10963    | 10975    | 10957    | 10976    | 10987    | 10967    |
| 349      | 346      | 347     | 354      | 323      | 315     | 335      | 329      | 322      | 324      | 10008    | 9995    | 10039   | 10081   | 10050    | 10050    | 9993     | 10009    | 9991     | 10010    | 10021    | 10001    |
| 354      | 351      | 354     | 361      | 332      | 322     | 342      | 336      | 329      | 331      | 10015    | 10002   | 10046   | 10088   | 10057    | 10057    | 10000    | 10016    | 9998     | 10017    | 10028    | 10008    |
| 310      | 307      | 308     | 315      | 286      | 276     | 296      | 290      | 283      | 285      | 9971     | 9958    | 10002   | 10044   | 10013    | 10013    | 9956     | 9972     | 9954     | 9973     | 9984     | 9964     |
| 405      | 402      | 403     | 409      | 381      | 371     | 391      | 385      | 378      | 380      | 10057    | 10044   | 10088   | 10129   | 10099    | 10099    | 10042    | 10058    | 10040    | 10059    | 10070    | 10050    |
| 225      | 222      | 297     | 304      | 275      | 265     | 285      | 279      | 272      | 274      | 9976     | 9963    | 10007   | 10049   | 10018    | 10018    | 9961     | 9977     | 9959     | 9976     | 9987     | 9967     |
| 250      | 247      | 322     | 329      | 300      | 290     | 310      | 304      | 297      | 299      | 9998     | 9985    | 10029   | 10071   | 10040    | 10040    | 9983     | 9999     | 9981     | 9998     | 10009    | 9989     |
| 204      | 201      | 282     | 289      | 260      | 250     | 270      | 264      | 257      | 259      | 9964     | 9951    | 9995    | 10037   | 10006    | 10006    | 9949     | 9965     | 9947     | 9964     | 9975     | 9955     |
| 229      | 226      | 317     | 324      | 295      | 285     | 305      | 299      | 292      | 294      | 9994     | 9981    | 10025   | 10067   | 10036    | 10036    | 9979     | 9995     | 9977     | 9994     | 10005    | 9985     |
| 234      | 231      | 321     | 328      | 300      | 290     | 308      | 304      | 297      | 299      | 10003    | 9990    | 10034   | 10076   | 10045    | 10045    | 9988     | 10004    | 9986     | 10003    | 10014    | 9994     |
| 237      | 234      | 324     | 331      | 303      | 293     | 311      | 307      | 300      | 302      | 10006    | 9993    | 10037   | 10079   | 10048    | 10048    | 9991     | 10007    | 9989     | 10006    | 10017    | 9997     |
| 238      | 235      | 334     | 341      | 312      | 302     | 322      | 316      | 309      | 311      | 10009    | 9996    | 10040   | 10082   | 10051    | 10051    | 9994     | 10010    | 9992     | 10009    | 10020    | 10000    |
|          | 145      | 342     | 349      | 320      | 310     | 330      | 324      | 317      | 319      | 10019    | 10006   | 10050   | 10092   | 10061    | 10061    | 10004    | 10020    | 10002    | 10019    | 10030    | 10010    |
| 145      |          | 338     | 346      | 317      | 307     | 327      | 321      | 314      | 316      | 10016    | 10003   | 10047   | 10089   | 10058    | 10058    | 10001    | 10017    | 9999     | 10016    | 10027    | 10007    |
| 342      | 338      |         | 183      | 204      | 200     | 220      | 214      | 207      | 209      | 10017    | 10004   | 10048   | 10090   | 10059    | 10059    | 10002    | 10018    | 10000    | 10017    | 10028    | 10008    |
| 349      | 346      | 183     |          | 211      | 207     | 227      | 221      | 214      | 216      | 10022    | 10009   | 10053   | 10095   | 10064    | 10064    | 10007    | 10023    | 10005    | 10022    | 10033    | 10013    |
| 320      | 317      | 204     | 211      |          | 178     | 198      | 192      | 185      | 187      | 9994     | 9981    | 10025   | 10067   | 10036    | 10036    | 9979     | 9995     | 9977     | 9994     | 10005    | 9985     |
| 310      | 307      | 200     | 207      | 178      |         | 178      | 172      | 165      | 167      | 9987     | 9974    | 10018   | 10060   | 10029    | 10029    | 9972     | 9988     | 9970     | 9987     | 9998     | 9978     |
| 330      | 327      | 220     | 227      | 198      | 178     |          | 94       | 101      | 103      | 10005    | 9992    | 10036   | 10078   | 10047    | 10047    | 9990     | 10006    | 9988     | 10005    | 10016    | 9996     |
| 324      | 321      | 214     | 221      | 192      | 172     | 94       |          | 95       | 97       | 9997     | 9984    | 10028   | 10070   | 10039    | 10039    | 9982     | 9998     | 9980     | 9997     | 10008    | 9988     |
| 317      | 314      | 207     | 214      | 185      | 165     | 101      | 95       |          | 40       | 9994     | 9981    | 10025   | 10067   | 10036    | 10036    | 9979     | 9995     | 9977     | 9994     | 10005    | 9985     |
| 319      | 316      | 209     | 216      | 187      | 167     | 103      | 97       | 40       |          | 9996     | 9983    | 10027   | 10069   | 10038    | 10038    | 9981     | 9997     | 9979     | 9996     | 10007    | 9987     |
| 10019    | 10016    | 10017   | 10022    | 9994     | 9987    | 10005    | 9997     | 9994     | 9996     |          | 74      | 221     | 269     | 234      | 234      | 171      | 185      | 165      | 186      | 197      | 177      |
| 10006    | 10003    | 10004   | 10009    | 9981     | 9974    | 9992     | 9984     | 9981     | 9983     | 74       |         | 209     | 257     | 222      | 222      | 159      | 173      | 153      | 174      | 185      | 165      |
| 10050    | 10047    | 10048   | 10053    | 10025    | 10018   | 10036    | 10028    | 10025    | 10027    | 221      | 209     |         | 302     | 267      | 267      | 210      | 224      | 204      | 225      | 236      | 216      |
| 10092    | 10089    | 10090   | 10095    | 10067    | 10060   | 10078    | 10070    | 10067    | 10069    | 269      | 257     | 302     |         | 267      | 267      | 258      | 272      | 252      | 273      | 284      | 264      |
| 10061    | 10058    | 10059   | 10064    | 10036    | 10029   | 10047    | 10039    | 10036    | 10038    | 234      | 222     | 267     | 267     |          | 0        | 223      | 237      | 217      | 238      | 249      | 229      |
| 10061    | 10058    | 10059   | 10064    | 10036    | 10029   | 10047    | 10039    | 10036    | 10038    | 234      | 222     | 267     | 267     | 0        |          | 223      | 237      | 217      | 238      | 249      | 229      |
| 10004    | 10001    | 10002   | 10007    | 9979     | 9972    | 9990     | 9982     | 9979     | 9981     | 171      | 159     | 210     | 258     | 223      | 223      |          | 124      | 122      | 143      | 154      | 134      |
| 10020    | 10017    | 10018   | 10023    | 9995     | 9988    | 10006    | 9998     | 9995     | 9997     | 185      | 173     | 224     | 272     | 237      | 237      | 124      |          | 136      | 157      | 168      | 148      |
| 10002    | 9999     | 10000   | 10005    | 9977     | 9970    | 9988     | 9980     | 9977     | 9979     | 165      | 153     | 204     | 252     | 217      | 217      | 122      | 136      |          | 133      | 144      | 124      |
| 10019    | 10016    | 10017   | 10022    | 9994     | 9987    | 10005    | 9997     | 9994     | 9996     | 186      | 174     | 225     | 273     | 238      | 238      | 143      | 157      | 133      |          | 57       | 37       |
| 10030    | 10027    | 10028   | 10033    | 10005    | 9998    | 10016    | 10008    | 10005    | 10007    | 197      | 185     | 236     | 284     | 249      | 249      | 154      | 168      | 144      | 57       |          | 46       |
| 10010    | 10007    | 10008   | 10013    | 9985     | 9978    | 9996     | 9988     | 9985     | 9987     | 177      | 165     | 216     | 264     | 229      | 229      | 134      | 148      | 124      | 37       | 46       |          |

**Supplemental table 4:** Amino acid variation in the agr system of *mecC* MRSA

| ID        | Amino acid sequences (predicted) |            |      |       |            |                                  |       |       |      |
|-----------|----------------------------------|------------|------|-------|------------|----------------------------------|-------|-------|------|
|           | CC                               | Hemolysins |      |       | <i>agr</i> | Accessory gene regulatory system |       |       |      |
|           |                                  | alpha      | beta | delta |            | AgrA                             | AgrB  | AgrC  | AgrD |
| IMT31818  | 599                              | WT         | WT   | WT    | I          | ΔN177                            | A182T | WT    | WT   |
| IMT32509  | 599                              | WT         | WT   | WT    | I          | WT                               | A182T | WT    | WT   |
| IMT32513  | 599                              | WT         | WT   | WT    | I          | WT                               | A182T | WT    | WT   |
| IMT36943  | 599                              | WT         | WT   | WT    | I          | WT                               | A182T | WT    | WT   |
| IMT36947  | 599                              | WT         | WT   | WT    | I          | WT                               | A182T | WT    | WT   |
| IMT36948  | 599                              | WT         | WT   | WT    | I          | WT                               | A182T | WT    | WT   |
| IMT38116  | 599                              | WT         | WT   | WT    | I          | WT                               | A182T | WT    | WT   |
| IMT39824  | 599                              | WT         | WT   | WT    | I          | F196S                            | A182T | WT    | WT   |
| IMT39825  | 599                              | WT         | WT   | WT    | I          | WT                               | A182T | WT    | WT   |
| RKI5962   | 599                              | WT         | WT   | WT    | I          | WT                               | A182T | WT    | WT   |
| RKI5963   | 599                              | WT         | WT   | WT    | I          | WT                               | A182T | WT    | WT   |
| RKI5964   | 599                              | WT         | WT   | WT    | I          | WT                               | A182T | WT    | WT   |
| IMT36945  | 49                               | WT         | WT   | WT    | II         | short                            | Y76C  | WT    | WT   |
| RKI5972   | 49                               | WT         | WT   | WT    | II         | WT                               | Y76C  | WT    | WT   |
| IMT31819* | 130                              | WT         | WT   | WT    | III        | IS                               | WT    | WT    | WT   |
| IMT32510  | 130                              | WT         | WT   | WT    | III        | WT                               | WT    | G284D | WT   |
| IMT32929  | 130                              | WT         | WT   | WT    | III        | WT                               | WT    | E216K | WT   |
| IMT34478  | 130                              | WT         | WT   | WT    | III        | S215P                            | WT    | WT    | WT   |
| IMT34479  | 130                              | α IS       | WT   | WT    | III        | WT                               | WT    | N5S   | WT   |
| IMT34480  | 130                              | α IS       | WT   | WT    | III        | WT                               | WT    | WT    | WT   |
| IMT34488  | 130                              | WT         | WT   | WT    | III        | WT                               | WT    | WT    | WT   |
| IMT34489  | 130                              | Δ          | WT   | WT    | III        | G68D                             | WT    | WT    | WT   |
| IMT34491  | 130                              | WT         | WT   | WT    | III        | WT                               | WT    | WT    | WT   |



|           |      |       |      |    |     |       |    |      |    |
|-----------|------|-------|------|----|-----|-------|----|------|----|
| IMT36946  | 130  | WT    | WT   | WT | III | WT    | WT | WT   | WT |
| IMT36950  | 130  | T12I  | WT   | WT | III | WT    | WT | WT   | WT |
| IMT38115  | 130  | WT    | WT   | WT | III | WT    | WT | WT   | WT |
| IMT38119* | 130  | WT    | WT   | WT | III | WT    | WT | WT   | WT |
| IMT39816  | 130  | K189E | WT   | WT | III | WT    | WT | WT   | WT |
| IMT39819  | 130  | WT    | WT   | WT | III | WT    | WT | WT   | WT |
| IMT40506  | 130  | WT    | WT   | WT | III | WT    | WT | WT   | WT |
| IMT41554  | 130  | WT    | WT   | WT | III | WT    | WT | WT   | WT |
| RKI5965   | 130  | WT    | WT   | WT | III | WT    | WT | WT   | WT |
| RKI5966*  | 130  | WT    | WT   | WT | III | WT    | WT | Q16H | WT |
| RKI5967   | 130  | D211G | WT   | WT | III | WT    | WT | WT   | WT |
| RKI5968   | 130  | WT    | WT   | WT | III | WT    | WT | WT   | WT |
| IMT34485  | 1943 | WT    | WT   | WT | IV  | WT    | WT | I64S | WT |
| IMT36952  | 1943 | WT    | P    | WT | IV  | C199R | WT | I64S | WT |
| IMT38113  | 1943 | WT    | P    | WT | IV  | WT    | WT | I64S | WT |
| IMT39820  | 1943 | WT    | WT   | WT | IV  | WT    | WT | I64S | WT |
| IMT40504  | 1943 | WT    | A68V | WT | IV  | WT    | WT | I64S | WT |
| IMT40507  | 1943 | WT    | P    | WT | IV  | WT    | WT | I64S | WT |
| RKI5969   | 1943 | WT    | WT   | WT | IV  | WT    | WT | I64S | WT |
| RKI5970   | 1943 | WT    | WT   | WT | IV  | WT    | WT | I64S | WT |
| RKI5971   | 1943 | WT    | WT   | WT | IV  | WT    | WT | I64S | WT |
| RKI5973   | 1943 | WT    | P    | WT | IV  | WT    | WT | I64S | WT |
|           |      |       |      |    |     |       |    |      |    |

Amino acid sequences for alpha, beta and delta haemolysins and the *agr* system of 45 *mecC*-MRSA. Position of amino acid changes with respect to the wild type (WT) reference sequence (below) are shown. Abbreviations:

ID, isolate number; CC, clonal complex; *agr*, accessory gene regulatory type; Δ, deletion; IS, insertion; \*, isolates further investigated with respect to biofilm structures using CLSM.

| NCBI Reference sequences (aa) and strain IDs                                                                                    |       |             |          |            |                 |            |                 |            |        |
|---------------------------------------------------------------------------------------------------------------------------------|-------|-------------|----------|------------|-----------------|------------|-----------------|------------|--------|
|                                                                                                                                 |       | AGR I       |          | AGR II     |                 | AGR III    |                 | AGR IV     |        |
|                                                                                                                                 |       | accession   | strain   | accession  | strain          | accession  | strain          | accession  | strain |
| Agr                                                                                                                             | AgrA  | POA016.1    | MW2      | POA016.1   | MW2             | POA016.1   | MW2             | POA016.1   | MW2    |
|                                                                                                                                 | AgrB  | QBY49017.1  | O268     | CZQ66246.1 | 1943STDY5698362 | AUG74347.1 | O46             | SAO20788.1 | n.a.   |
|                                                                                                                                 | AgrC  | EVG59461.1  | OCMM6067 | KIT97067.1 | SA-120          | KIT81064.1 | SA-006<br>(N5S) | ABB17521.1 | H560   |
|                                                                                                                                 | AgrD  | YP_500744.1 | NCTC8325 | ABQ49857.1 | JH9             | EFH25310.1 | ATCC 51811      | AGU55642.1 | 6850   |
|                                                                                                                                 |       |             |          |            |                 |            |                 |            |        |
| Hemolysins                                                                                                                      | alpha | EFK81723.1  | TCH70    |            |                 |            |                 |            |        |
|                                                                                                                                 | beta  | AAB32218.1  | 126/89   |            |                 |            |                 |            |        |
|                                                                                                                                 | delta | Q2FWM8      | NCTC8325 |            |                 |            |                 |            |        |
|                                                                                                                                 |       |             |          |            |                 |            |                 |            |        |
| Abbreviations: n.a. not available; accession, NCBI accession number for amino acid sequence; strain, wild type/reference strain |       |             |          |            |                 |            |                 |            |        |

**Supplemental table 5.** Amino acid variations in global regulators (Protein ID / Strain ID)

|                  | <b>SaeS</b>              | <b>SaeR</b>        | <b>SrrA</b>                        | <b>SrrB</b>          | <b>ArlR</b>        | <b>ArlS</b>                                  | <b>SarA</b>               | <b>SarR</b>                        | <b>Rot</b>          | <b>MgrA</b>                        | <b>SigB</b>                 |
|------------------|--------------------------|--------------------|------------------------------------|----------------------|--------------------|----------------------------------------------|---------------------------|------------------------------------|---------------------|------------------------------------|-----------------------------|
|                  | Histidine protein kinase | Response regulator | Transcriptional regulatory protein | Sensor protein       | Response regulator | Signal transduction histidine-protein kinase | Transcriptional regulator | HTH-type transcriptional regulator | Repressor of toxins | HTH-type transcriptional regulator | RNA polymerase sigma factor |
| <b>Reference</b> | Q7A6V4 / N315            | Q7A6V3 / N315      | Q7A5H6 / N315                      | Q8NWF3 / MW2         | Q9KJN4 / NCTC 8325 | WP_06413 3950.1                              | Q7A732 / N315             | Q2FEJ8-1 / USA300                  | EEW4745 2.1         | Q7A6X2 / N315                      | P95844                      |
| IMT31818         | WT                       | WT                 | WT                                 | A322T; V434I (CC599) | WT                 | WT                                           | WT                        | WT                                 | WT                  | WT                                 | WT                          |
| IMT32509         | WT                       | WT                 | WT                                 | A322T; V434I (CC599) | WT                 | WT                                           | WT                        | WT                                 | WT                  | WT                                 | WT                          |
| IMT32513         | WT                       | WT                 | WT                                 | A322T; V434I (CC599) | WT                 | WT                                           | WT                        | WT                                 | WT                  | WT                                 | WT                          |
| IMT36943         | WT                       | WT                 | WT                                 | A322T; V434I (CC599) | WT                 | WT                                           | WT                        | WT                                 | WT                  | WT                                 | WT                          |
| IMT36947         | WT                       | WT                 | WT                                 | A322T; V434I (CC599) | WT                 | WT                                           | WT                        | WT                                 | WT                  | WT                                 | WT                          |
| IMT36948         | WT                       | WT                 | WT                                 | A322T; V434I (CC599) | WT                 | WT                                           | WT                        | WT                                 | WT                  | WT                                 | WT                          |
| IMT38116         | WT                       | WT                 | WT                                 | A322T; V434I (CC599) | WT                 | WT                                           | WT                        | WT                                 | WT                  | WT                                 | WT                          |
| IMT39824         | WT                       | WT                 | WT                                 | A322T; V434I (CC599) | WT                 | WT                                           | WT                        | WT                                 | WT                  | WT                                 | WT                          |
| IMT39825         | WT                       | WT                 | WT                                 | A322T;               | WT                 | WT                                           | WT                        | WT                                 | WT                  | WT                                 | WT                          |

|                  |                  |                  |                  |                            |                          |                    |                  |                      |                |                  |        |
|------------------|------------------|------------------|------------------|----------------------------|--------------------------|--------------------|------------------|----------------------|----------------|------------------|--------|
|                  |                  |                  |                  | V434I<br>(CC599)           |                          |                    |                  |                      |                |                  |        |
| RKI5962          | WT               | WT               | WT               | A322T;<br>V434I<br>(CC599) | WT                       | WT                 | WT               | WT                   | WT             | WT               | WT     |
| RKI5963          | WT               | WT               | WT               | A322T;<br>V434I<br>(CC599) | WT                       | WT                 | WT               | WT                   | WT             | WT               | WT     |
| RKI5964          | WT               | WT               | WT               | A322T;<br>V434I<br>(CC599) | WT                       | WT                 | WT               | WT                   | WT             | WT               | WT     |
| <b>Reference</b> | Q7A6V4 /<br>N315 | Q7A6V3 /<br>N315 | Q7A5H6 /<br>N315 | Q8NWF3 /<br>MW2            | Q9KJN4 /<br>NCTC<br>8325 | WP_06413<br>3950.1 | Q7A732 /<br>N315 | Q2FEJ8-1<br>/ USA300 | EEW4745<br>2.1 | Q7A6X2 /<br>N315 | P95844 |
| IMT36945         | WT               | WT               | WT               | V434I;<br>D509A            | WT                       | WT                 | WT               | WT                   | WT             | WT               | WT     |
| RKI5972          | WT               | WT               | WT               | V434I;<br>D509A            | WT                       | WT                 | WT               | WT                   | WT             | WT               | WT     |
| <b>Reference</b> | Q7A6V4 /<br>N315 | Q7A6V3 /<br>N315 | Q7A5H6 /<br>N315 | Q8NWF3 /<br>MW2            | Q9KJN4 /<br>NCTC<br>8325 | WP_06413<br>3950.1 | Q7A732 /<br>N315 | Q2FEJ8-1<br>/ USA300 | EEW4745<br>2.1 | Q7A6X2 /<br>N315 | P95844 |
| IMT31819         | WT               | WT               | WT               | WT                         | WT                       | WT                 | WT               | WT                   | WT             | WT               | WT     |
| IMT32510         | WT               | E225G            | WT               | WT                         | WT                       | WT                 | WT               | WT                   | WT             | WT               | WT     |
| IMT32929         | WT               | WT               | WT               | WT                         | WT                       | WT                 | WT               | WT                   | WT             | WT               | A253V  |
| IMT34478         | WT               | WT               | WT               | WT                         | WT                       | WT                 | WT               | WT                   | WT             | WT               | WT     |
| IMT34479         | WT               | WT               | WT               | WT                         | WT                       | WT                 | WT               | WT                   | WT             | WT               | WT     |
| IMT34480         | WT               | WT               | WT               | WT                         | WT                       | WT                 | WT               | WT                   | WT             | WT               | WT     |
| IMT34488         | WT               | WT               | WT               | WT                         | WT                       | WT                 | WT               | WT                   | WT             | WT               | WT     |
| IMT34489         | WT               | WT               | WT               | WT                         | WT                       | WT                 | WT               | WT                   | WT             | WT               | WT     |
| IMT34491         | WT               | WT               | WT               | WT                         | WT                       | WT                 | WT               | WT                   | WT             | WT               | WT     |
| IMT36946         | WT               | WT               | WT               | WT                         | WT                       | WT                 | WT               | WT                   | WT             | WT               | WT     |
| IMT36950         | WT               | WT               | WT               | WT                         | WT                       | WT                 | WT               | WT                   | WT             | WT               | WT     |
| IMT38115         | WT               | WT               | WT               | WT                         | WT                       | WT                 | WT               | WT                   | WT             | WT               | WT     |
| IMT38119         | WT               | WT               | WT               | T123S                      | WT                       | WT                 | WT               | WT                   | R59I           | WT               | WT     |
| IMT39816         | WT               | WT               | WT               | WT                         | WT                       | WT                 | WT               | WT                   | WT             | WT               | WT     |
| IMT39819         | WT               | WT               | WT               | WT                         | WT                       | WT                 | WT               | WT                   | WT             | WT               | WT     |
| IMT40506         | WT               | WT               | WT               | WT                         | WT                       | WT                 | WT               | WT                   | WT             | WT               | WT     |
| IMT41554         | WT               | WT               | WT               | insertion                  | WT                       | WT                 | WT               | WT                   | WT             | WT               | WT     |

|           |               |               |               |              |                    |                 |               |                   |             |               |        |
|-----------|---------------|---------------|---------------|--------------|--------------------|-----------------|---------------|-------------------|-------------|---------------|--------|
| RKI5965   | WT            | WT            | WT            | WT           | WT                 | WT              | WT            | WT                | WT          | WT            | WT     |
| RKI5966   | WT            | WT            | WT            | WT           | WT                 | WT              | WT            | WT                | WT          | WT            | WT     |
| RKI5967   | WT            | WT            | WT            | WT           | WT                 | WT              | WT            | WT                | WT          | WT            | WT     |
| RKI5968   | WT            | WT            | WT            | WT           | WT                 | WT              | WT            | WT                | WT          | WT            | WT     |
| Reference | Q7A6V4 / N315 | Q7A6V3 / N315 | Q7A5H6 / N315 | Q8NWF3 / MW2 | Q9KJN4 / NCTC 8325 | WP_10320 5040.1 | Q7A732 / N315 | Q2FEJ8-1 / USA300 | EEW4745 2.1 | Q7A6X2 / N315 | P95844 |
| IMT34485  | WT            | WT            | WT            | WT           | WT                 | WT              | WT            | WT                | WT          | WT            | WT     |
| IMT36952  | WT            | WT            | WT            | WT           | WT                 | WT              | WT            | WT                | WT          | WT            | WT     |
| IMT38113  | D269G         | WT            | WT            | WT           | WT                 | WT              | WT            | WT                | WT          | WT            | WT     |
| IMT39820  | WT            | WT            | WT            | WT           | WT                 | WT              | WT            | WT                | WT          | WT            | WT     |
| IMT40504  | P193L         | WT            | WT            | WT           | WT                 | WT              | WT            | WT                | WT          | WT            | WT     |
| IMT40507  | WT            | WT            | WT            | WT           | WT                 | WT              | WT            | WT                | WT          | WT            | WT     |
| RKI5969   | WT            | WT            | WT            | WT           | WT                 | WT              | WT            | WT                | WT          | WT            | WT     |
| RKI5970   | WT            | WT            | WT            | WT           | WT                 | WT              | WT            | WT                | WT          | WT            | WT     |
| RKI5971   | WT            | WT            | WT            | WT           | WT                 | WT              | WT            | WT                | WT          | WT            | WT     |
| RKI5973   | WT            | WT            | WT            | WT           | WT                 | WT              | WT            | WT                | WT          | WT            | I214N  |

WT, wild type

**Supplemental table 6:** alpha-, beta- and delta- haemolysin abundance levels

| ID       | Haemolysin |        |          |
|----------|------------|--------|----------|
|          | alpha      | beta   | delta    |
| IMT31818 | 226466     | 0      | 0        |
| IMT32509 | 182889     | 55119  | 40203500 |
| IMT32513 | 352463     | 606824 | 49393600 |
| IMT36943 | 362910     | 258289 | 5991790  |
| IMT36947 | 50962      | 68713  | 25962700 |
| IMT36948 | 144179     | 141258 | 17740600 |
| IMT38116 | 265550     | 177798 | 56901700 |

|           |         |         |          |
|-----------|---------|---------|----------|
| IMT39824  | 104197  | 34039   | 0        |
| IMT39825  | 90945   | 199562  | 39853100 |
| RKI5962   | 274323  | 1006250 | 42899800 |
| RKI5963   | 871106  | 615917  | 20333500 |
| RKI5964   | 261854  | 134389  | 29062200 |
| IMT36945  | 136132  | 225265  | 0        |
| RKI5972   | 369213  | 230575  | 64359000 |
| IMT31819* | 0       | 111460  | 0        |
| IMT32510  | 96885   | 357332  | 242092   |
| IMT32929  | 286669  | 835736  | 167153   |
| IMT34478  | 0       | 151672  | 0        |
| IMT34479  | 0       | 184999  | 11537100 |
| IMT34480  | 0       | 377950  | 11540400 |
| IMT34488  | 0       | 2829180 | 10020100 |
| IMT34489  | 0       | 145289  | 0        |
| IMT34491  | 289696  | 663535  | 13129800 |
| IMT36946  | 0       | 2268950 | 17193500 |
| IMT36950  | 66586   | 1679970 | 16183400 |
| IMT38115  | 79961   | 1564050 | 16393100 |
| IMT38119* | 190628  | 734137  | 16701500 |
| IMT39816  | 58233   | 1993900 | 15230400 |
| IMT39819  | 28569   | 551468  | 11417000 |
| IMT40506  | 0       | 536742  | 9470570  |
| IMT41554  | 101750  | 1824170 | 12473100 |
| RKI5965   | 46568   | 1264390 | 20195000 |
| RKI5966*  | 47915   | 366644  | 0        |
| RKI5967   | 1097210 | 2914410 | 15388400 |
| RKI5968   | 93002   | 2544930 | 16805900 |
| IMT34485  | 135750  | 1403930 | 69541000 |

|          |         |         |          |
|----------|---------|---------|----------|
| IMT36952 | 0       | 0       | 0        |
| IMT38113 | 755597  | 0       | 67475600 |
| IMT39820 | 190022  | 740548  | 94823900 |
| IMT40504 | 1740330 | 1017250 | 84429200 |
| IMT40507 | 81362   | 0       | 80901100 |
| RKI5969  | 0       | 1317800 | 28418500 |
| RKI5970  | 53724   | 1498920 | 25153000 |
| RKI5971  | 0       | 1351630 | 28530200 |
| RKI5973  | 1917410 | 0       | 37149400 |
| RN4220   | 1379010 | 350906  | 42317    |
| FPR3757  | 1012840 | 0       | 15792500 |
| NE1532   | 1060150 | 0       | 0        |

\* selected for CLSM

**Supplemental table 6.** Original data from the biofilm crystal violet-staining assay

**Biofilm crystal violet assay (original data)**

| ID       | 1 <sup>st</sup> biological replicate |      |      |      | 2 <sup>nd</sup> biological replicate |      |      |      | 3 <sup>rd</sup> biological replicate |      |      |      | mean absorbance<br>492nm |
|----------|--------------------------------------|------|------|------|--------------------------------------|------|------|------|--------------------------------------|------|------|------|--------------------------|
|          | 1                                    | 2    | 3    | 4    | 5                                    | 6    | 7    | 8    | 9                                    | 10   | 11   | 12   |                          |
| IMT31818 | 0,29                                 | 0,35 | 0,25 | 0,26 | 0,21                                 | 0,26 | 0,21 | 0,19 | 0,17                                 | 0,25 | 0,22 | 0,18 | 0,2369                   |
| IMT31819 | 0,14                                 | 0,15 | 0,13 | 0,16 | 0,19                                 | 0,24 | 0,18 | 0,16 | 0,16                                 | 0,16 | 0,14 | 0,19 | 0,1647                   |
| IMT32509 | 0,11                                 | 0,11 | 0,12 | 0,11 | 0,11                                 | 0,12 | 0,11 | 0,11 | 0,12                                 | 0,11 | 0,10 | 0,12 | 0,1115                   |
| IMT32510 | 0,21                                 | 0,23 | 0,29 | 0,20 | 0,22                                 | 0,19 | 0,20 | 0,22 | 0,21                                 | 0,33 | 0,22 | 0,20 | 0,2275                   |
| IMT32513 | 0,16                                 | 0,22 | 0,27 | 0,21 | 0,32                                 | 0,29 | 0,26 | 0,28 | 0,22                                 | 0,25 | 0,20 | 0,23 | 0,2428                   |
| IMT32929 | 0,52                                 | 0,54 | 0,45 | 0,71 | 0,50                                 | 0,47 | 0,49 | 0,45 | 0,75                                 | 0,75 | 0,72 | 0,83 | 0,5969                   |
| IMT34478 | 0,76                                 | 0,87 | 0,73 | 0,84 | 0,96                                 | 0,87 | 0,82 | 0,66 | 1,11                                 | 0,94 | 0,84 | 0,66 | 0,8366                   |
| IMT34479 | 0,28                                 | 0,34 | 0,48 | 0,42 | 0,30                                 | 0,30 | 0,27 | 0,26 | 0,23                                 | 0,26 | 0,23 | 0,22 | 0,2982                   |
| IMT34480 | 0,23                                 | 0,27 | 0,26 | 0,21 | 0,32                                 | 0,37 | 0,37 | 0,23 | 0,33                                 | 0,34 | 0,27 | 0,39 | 0,2978                   |
| IMT34485 | 0,15                                 | 0,09 | 0,08 | 0,09 | 0,11                                 | 0,09 | 0,09 | 0,10 | 0,10                                 | 0,09 | 0,09 | 0,08 | 0,0970                   |
| IMT34488 | 0,26                                 | 0,30 | 0,25 | 0,28 | 0,21                                 | 0,23 | 0,18 | 0,19 | 0,17                                 | 0,21 | 0,17 | 0,20 | 0,2181                   |
| IMT34489 | 0,25                                 | 0,23 | 0,25 | 0,24 | 0,18                                 | 0,19 | 0,23 | 0,24 | 0,22                                 | 0,24 | 0,23 | 0,19 | 0,2238                   |
| IMT34491 | 0,18                                 | 0,20 | 0,19 | 0,20 | 0,19                                 | 0,21 | 0,19 | 0,17 | 0,16                                 | 0,20 | 0,17 | 0,20 | 0,1893                   |
| IMT36943 | 0,19                                 | 0,28 | 0,24 | 0,24 | 0,16                                 | 0,21 | 0,20 | 0,19 | 0,16                                 | 0,22 | 0,22 | 0,20 | 0,2068                   |
| IMT36945 | 0,17                                 | 0,18 | 0,18 | 0,20 | 0,17                                 | 0,21 | 0,17 | 0,21 | 0,18                                 | 0,19 | 0,18 | 0,20 | 0,1857                   |
| IMT36946 | 0,19                                 | 0,12 | 0,14 | 0,10 | 0,13                                 | 0,11 | 0,11 | 0,11 | 0,14                                 | 0,08 | 0,11 | 0,11 | 0,1216                   |
| IMT36947 | 0,46                                 | 0,36 | 0,40 | 0,38 | 0,42                                 | 0,46 | 0,42 | 0,53 | 0,19                                 | 0,26 | 0,23 | 0,24 | 0,3621                   |
| IMT36948 | 0,21                                 | 0,23 | 0,23 | 0,39 | 0,42                                 | 0,53 | 0,37 | 0,46 | 0,24                                 | 0,22 | 0,23 | 0,25 | 0,3142                   |
| IMT36950 | 0,16                                 | 0,17 | 0,25 | 0,23 | 0,13                                 | 0,13 | 0,16 | 0,16 | 0,14                                 | 0,16 | 0,14 | 0,21 | 0,1693                   |
| IMT36952 | 1,00                                 | 1,19 | 1,18 | 1,08 | 1,08                                 | 1,26 | 1,40 | 1,19 | 1,35                                 | 1,56 | 1,57 | 1,21 | 1,2555                   |
| IMT38113 | 0,10                                 | 0,10 | 0,09 | 0,10 | 0,09                                 | 0,09 | 0,09 | 0,09 | 0,12                                 | 0,09 | 0,09 | 0,12 | 0,0973                   |
| IMT38115 | 0,20                                 | 0,17 | 0,18 | 0,25 | 0,16                                 | 0,25 | 0,22 | 0,24 | 0,18                                 | 0,36 | 0,35 | 0,33 | 0,2407                   |
| IMT38116 | 0,08                                 | 0,11 | 0,09 | 0,11 | 0,13                                 | 0,12 | 0,10 | 0,14 | 0,10                                 | 0,09 | 0,10 | 0,13 | 0,1093                   |
| IMT38119 | 0,20                                 | 0,20 | 0,22 | 0,26 | 0,18                                 | 0,19 | 0,18 | 0,19 | 0,29                                 | 0,33 | 0,43 | 0,32 | 0,2473                   |
| IMT39816 | 0,18                                 | 0,23 | 0,24 | 0,28 | 0,23                                 | 0,25 | 0,22 | 0,22 | 0,23                                 | 0,23 | 0,35 | 0,36 | 0,2503                   |
| IMT39819 | 1,77                                 | 1,49 | 1,67 | 1,75 | 2,37                                 | 2,46 | 2,36 | 2,37 | 1,99                                 | 1,46 | 2,39 | 1,71 | 1,9811                   |



|          |      |      |      |      |      |      |      |      |      |      |      |      |        |
|----------|------|------|------|------|------|------|------|------|------|------|------|------|--------|
| IMT39820 | 0,15 | 0,18 | 0,17 | 0,14 | 0,11 | 0,15 | 0,15 | 0,14 | 0,20 | 0,19 | 0,18 | 0,20 | 0,1636 |
| IMT39824 | 0,26 | 0,27 | 0,30 | 0,28 | 0,14 | 0,16 | 0,15 | 0,19 | 0,15 | 0,14 | 0,14 | 0,15 | 0,1932 |
| IMT39825 | 0,10 | 0,09 | 0,08 | 0,09 | 0,15 | 0,14 | 0,11 | 0,11 | 0,10 | 0,11 | 0,12 | 0,11 | 0,1089 |
| IMT40504 | 0,25 | 0,35 | 0,25 | 0,29 | 0,19 | 0,20 | 0,21 | 0,20 | 0,30 | 0,32 | 0,35 | 0,39 | 0,2730 |
| IMT40506 | 0,62 | 0,64 | 0,66 | 0,64 | 0,65 | 0,65 | 0,44 | 0,38 | 0,34 | 0,39 | 0,27 | 0,34 | 0,5013 |
| IMT40507 | 0,14 | 0,22 | 0,17 | 0,18 | 0,14 | 0,14 | 0,11 | 0,14 | 0,08 | 0,09 | 0,12 | 0,11 | 0,1363 |
| IMT41554 | 0,27 | 0,45 | 0,39 | 0,29 | 0,26 | 0,20 | 0,21 | 0,18 | 0,26 | 0,35 | 0,42 | 0,20 | 0,2898 |
| RKI5962  | 0,25 | 0,30 | 0,29 | 0,26 | 0,21 | 0,25 | 0,22 | 0,32 | 0,30 | 0,23 | 0,30 | 0,25 | 0,2652 |
| RKI5963  | 0,24 | 0,20 | 0,22 | 0,22 | 0,16 | 0,18 | 0,20 | 0,20 | 0,16 | 0,17 | 0,23 | 0,24 | 0,2011 |
| RKI5964  | 0,22 | 0,20 | 0,19 | 0,22 | 0,17 | 0,11 | 0,11 | 0,11 | 0,20 | 0,19 | 0,13 | 0,21 | 0,1713 |
| RKI5965  | 0,40 | 0,26 | 0,34 | 0,22 | 0,41 | 0,39 | 0,30 | 0,28 | 0,34 | 0,44 | 0,39 | 0,39 | 0,3448 |
| RKI5966  | 0,18 | 0,21 | 0,24 | 0,15 | 0,14 | 0,26 | 0,14 | 0,16 | 0,14 | 0,26 | 0,14 | 0,16 | 0,1828 |
| RKI5967  | 0,15 | 0,18 | 0,17 | 0,17 | 0,17 | 0,17 | 0,13 | 0,16 | 0,17 | 0,17 | 0,14 | 0,16 | 0,1614 |
| RKI5968  | 0,48 | 0,66 | 0,64 | 0,66 | 0,39 | 0,41 | 0,54 | 0,52 | 0,39 | 0,41 | 0,53 | 0,52 | 0,5127 |
| RKI5969  | 0,14 | 0,14 | 0,15 | 0,15 | 0,19 | 0,17 | 0,17 | 0,18 | 0,19 | 0,17 | 0,17 | 0,18 | 0,1666 |
| RKI5970  | 0,20 | 0,17 | 0,18 | 0,17 | 0,18 | 0,18 | 0,18 | 0,18 | 0,18 | 0,19 | 0,18 | 0,18 | 0,1804 |
| RKI5971  | 0,14 | 0,15 | 0,14 | 0,17 | 0,16 | 0,17 | 0,17 | 0,16 | 0,16 | 0,18 | 0,18 | 0,17 | 0,1632 |
| RKI5972  | 0,10 | 0,09 | 0,11 | 0,09 | 0,09 | 0,10 | 0,10 | 0,09 | 0,09 | 0,10 | 0,09 | 0,09 | 0,0960 |
| RKI5973  | 2,30 | 2,16 | 2,21 | 2,06 | 1,96 | 2,39 | 1,98 | 2,16 | 1,96 | 2,39 | 1,98 | 2,16 | 2,1418 |
| RP62A    | 4,08 | 4,02 | 2,69 | 2,05 | 2,02 | 2,27 | 2,03 | 2,02 | 2,03 | 4,33 | 3,92 | 3,91 |        |
|          | 3,94 | 2,78 | 3,40 | 3,54 | 3,39 | 3,27 | 4,30 | 4,28 | 4,17 | 4,04 | 4,80 | 4,80 |        |
|          | 3,90 | 4,10 |      |      | 3,66 | 3,74 |      |      | 3,81 | 3,95 |      |      | 3,5071 |
| TM300    | 0,10 | 0,13 | 0,06 | 0,08 | 0,07 | 0,05 | 0,08 | 0,08 | 0,05 | 0,05 | 0,07 | 0,09 |        |
|          | 0,08 | 0,07 | 0,09 | 0,08 | 0,07 | 0,05 | 0,10 | 0,12 | 0,18 | 0,11 | 0,11 | 0,13 |        |
|          | 0,14 | 0,15 |      |      | 0,13 | 0,09 |      |      | 0,12 | 0,09 |      |      | 0,0937 |

Measured optical density OD492 of all tested samples (three biological replicates). *S. epidermidis* RP62A and *S. carnosus* TM300 were used as positive and negative controls, respectively. A sample will be classified as biofilm positive if its measured optical density is at least three times the optical density of the negative control TM300.
